# Supplementary material
Source: Springer Nature journal article supplement (https://www.springermedizin.de/resource/supplementary/13012_2011_581_MOESM3_ESM.pdf/9630196)

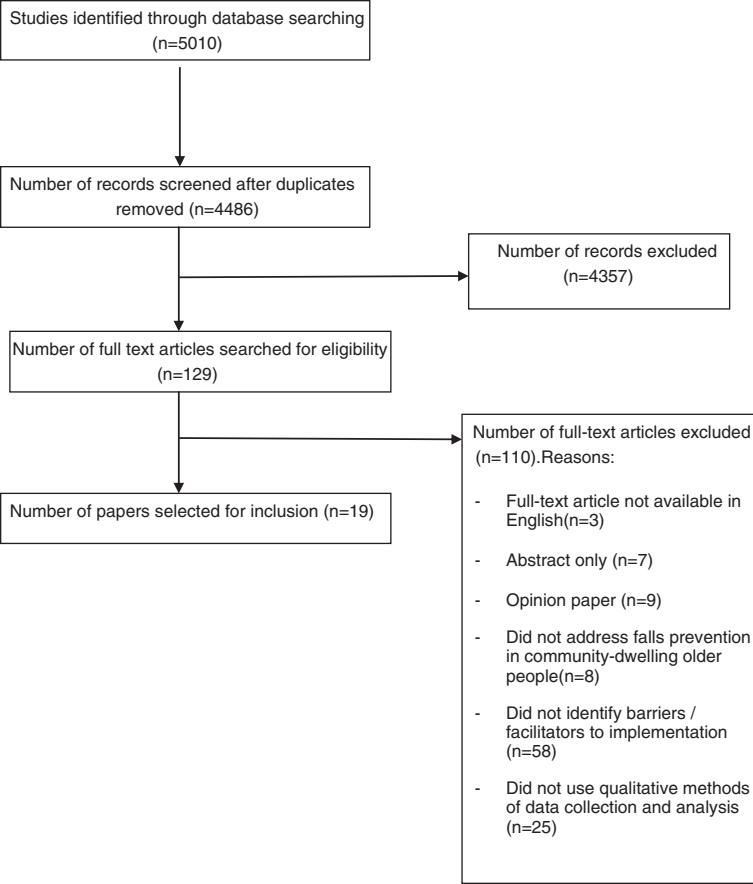

Supplement: MOESM3 [file 9630196]
